# Supplementary material for: The luxury effect beyond cities: bats respond to socioeconomic variation across landscapes
Source: BMC Ecol. 2019 Nov 1;19:46. doi: 10.1186/s12898-019-0262-8 (PMC6825354; doi:10.1186/s12898-019-0262-8)
Supplement: Supplementary file 2 — Additional file 2. Regression model results. Preliminary regression model results on the effects of temperature and year on worksheet 1; interaction model results on income and selected land cover on worksheet 2. [file 12898_2019_262_MOESM2_ESM.xlsx]

## Sheet: temperature-year models
	Eptesicus fuscus		Lasiurus borealis		Lasiurus cinereus		Lasionycteris noctivagans		Nycticeius humeralis		Perimyotis subflavus		Tadarida brasiliensis
	Estimate	p	Estimate	p	Estimate	p	Estimate	p	Estimate	p	Estimate	p	Estimate	p
temperature	-0.079	<0.001	0.019	<0.001	-0.028	<0.001	n/a	n/a	0.08	<0.001	0.076	<0.001	0.013	0.017
year-2016	-1.577	0.258	0.264	<0.001	-0.123	0.562	-1.443	0.407	-2.046	<0.001	3.432	0.009	0.477	0.004
year-2017	3.957	<0.001	0.416	<0.001	0.152	0.012	0.604	0.006	-1.407	<0.001	3.482	<0.001	0.441	0.01
year-2018	0.509	0.733	0.009	0.888	0.035	0.671	0.467	0.012	-2.066	<0.001	3.934	0.009	0.179	<0.001
temperature:year-2016	0.021	0.259	n/a	n/a	n/a	n/a	n/a	n/a	-0.052	<0.001	-0.016	0.017	n/a	n/a
temperature:year-2017	0.055	<0.001	n/a	n/a	n/a	n/a	n/a	n/a	-0.041	<0.001	-0.015	0.001	n/a	n/a
temperature:year-2018	0.003	0.049	n/a	n/a	n/a	n/a	n/a	n/a	-0.037	<0.001	-0.049	0.011	n/a	n/a

## Sheet: interaction models
Lasiurus borealis				Lasiurus cinereus				Nycticeius humeralis
variable	lower	upper		variable	lower	upper		variable	lower	upper
income + evergreen + income * evergreen				income + evergreen + income * evergreen				income + evergreen + income * evergreen
income	0.498	2.373		income	-5.094	-0.475		income	0.2152	1.7551
evergreen	0.0625	1.2998		evergreen	-1.24	1.418		evergreen	1.173	3.472
temp	0.0108	0.0151		spatial autocovariate	0.3305	0.7867		temp	0.0043	0.03
spatial autocovariate	0.1745	0.3812		income * evergreen	-1.877	1.3499		spatial autocovariate	0.2136	0.4117
income * evergreen	0.0044	0.1206						income * evergreen	-0.1348	0.0102
				income + shrub + income * shrub
income + mixed + income * mixed				income	-3.2	-0.521		income + shrub + income * shrub
income	0.7052	1.6786		shrub	-2.014	-1.911		income	0.3265	1.6061
mixed	-3.8532	2.7413		spatial autocovariate	0.2841	0.8178		shrub	1.475	1.974
temp	0.0019	0.024		income * shrub	-1.5448	2.0974		temp	0.0019	0.027
spatial autocovariate	0.1555	0.3653						spatial autocovariate	0.2366	0.4444
income * mixed	-0.2522	0.3651		income + grass + income * grass				income * shrub	-0.1485	0.053
				income	-2.473	-0.806
income + shrub + income * shrub				grass	-1.154	1.402		income + woody + income * shrub
income	0.455	1.993		spatial autocovariate	0.3803	0.7804		income	0.2008	1.6487
shrub	0.088	2.029		income * grass	-1.8732	0.9881		woody	-0.198	1.987
temp	0.0108	0.0142						temp	0.002	0.0274
spatial autocovariate	0.2156	0.4276		income + pasture + income * pasture				spatial autocovariate	0.2157	0.4198
income * shrub	-0.1867	0.0051		income	-2.1783	-2.1051		income * woody	-0.2713	0.0537
				pasture	-0.884	-0.258
				spatial autocovariate	0.6254	1.1482
				income * pasture	-2.1516	0.0587
				income + woody + income * woody
				income	-2.0706	-1.3512
				woody	-2.73	-2.67
				spatial autocovariate	0.0395	0.7771
				income * woody	0.214	2.358
				income + herb + income * herb
				income	-3.755	-0.948
				herb	-2.9	-1.965
				spatial autocovariate	0.3206	0.897
				income * herb	-0.487	2.235
